# Supplementary material
Source: ML conference proceedings conference paper supplement (https://openreview.net/forum?id=fviZhMCr62)
Supplement: supplementary_material [file attachment]

Table 4: Scene-01: Theater

| Category   | Scene                                                                 | Code | OD   | WP   | Path& Exec |
|------------|-----------------------------------------------------------------------|------|------|------|------------|
| Generic    | Drive to the helmet                                                   | Pass | Pass | Pass | Pass       |
| Generic    | Navigate to the mop                                                   | Pass | Pass | Pass | Pass       |
| Generic    | Go to the vacuum                                                      | Pass | Fail | Fail | Fail       |
| Generic    | Walk to the table                                                     | Pass | Pass | Pass | Pass       |
| Generic    | Go to the fire extinguisher                                           | Pass | Pass | Pass | Pass       |
| Generic    | Walk to the saw                                                       | Pass | Fail | Fail | Fail       |
| Specific   | Go to the red backpack                                                | Pass | Pass | Pass | Pass       |
| Specific   | Move to the orange bucket                                             | Pass | Pass | Pass | Pass       |
| Specific   | Drive to the chair on the right                                       | Pass | Pass | Pass | Fail       |
| Specific   | Walk to the white fan                                                 | Pass | Pass | Pass | Pass       |
| Specific   | Navigate to the black fan                                             | Pass | Pass | Pass | Pass       |
| Specific   | Navigate to the black speaker                                         | Pass | Pass | Pass | Pass       |
| Specific   | Run to the red bag                                                    | Pass | Pass | Fail | Fail       |
| Specific   | Move to the black chair in front of you                               | Pass | Pass | Pass | Pass       |
| Specific   | Walk to the blue chair                                                | Pass | Pass | Pass | Pass       |
| Relational | Go to the chair with the black backpack on it                         | Pass | Pass | Pass | Pass       |
| Relational | Go to the chair with the helmet on it                                 | Pass | Pass | Pass | Pass       |
| Relational | Go to the backpack next to the chair                                  | Pass | Fail | Fail | Fail       |
| Relational | Go to the backpack in front of the ladder                             | Pass | Pass | Pass | Pass       |
| Relational | Run to the person on the ladder                                       | Pass | Pass | Pass | Pass       |
| Relational | Drive to the man sitting on the table                                 | Pass | Pass | Pass | Pass       |
| Relational | Go to the third chair from the left                                   | Pass | Pass | Pass | Pass       |
| Contextual | Go to something that can carry water                                  | Pass | Pass | Pass | Pass       |
| Contextual | Navigate to the somethings that can wash the floor                    | Fail | Fail | Fail | Fail       |
| Contextual | My floor is dirty. Go to something that can fix it                    | Fail | Fail | Fail | Fail       |
| Contextual | Go somewhere that I throw something in                                | Pass | Pass | Pass | Pass       |
| Contextual | Walk to something that put out the fire                               | Pass | Fail | Fail | Fail       |
| Contextual | Go to something that can cool me down                                 | Pass | Fail | Fail | Fail       |
| Contextual | Go to something white that can cool me down                           | Fail | Fail | Fail | Fail       |
| Contextual | I am in the mood to listen to music. Go to something that can do that | Pass | Fail | Fail | Fail       |

## 6 Appendix

### 6.1 Navigation Prompts

The framework is tested on 4 different real-world environments. Further details about each of the environments are listed below:

- **Theater**, an indoor environment simulating a stage-like environment during set construction.
- **Lobby**, an indoor environment, mostly occupied with chairs and tables, posing more challenges in distinguishing specific objects and planning
- **Outdoor**, a larger environment with objects such as trees, cars, bikes, and sporting areas.
- **Courtyard**, an outdoor environment tested at night to challenge the framework with low-light images.

Along with the general objects present in the scene, we placed some additional items like backpacks, shoes, and cones into the scene. All the prompts tested in these 4 different environments are presented in Tables 4, 5, 6, and 7. For each of the prompts, we also highlighted whether each step succeeded or not.

Table 5: Scene-02: Lobby

| Category   | Scene                                                      | Code | OD   | WP   | Path& Exec |
|------------|------------------------------------------------------------|------|------|------|------------|
| Generic    | Run to the trash bag                                       | Pass | Pass | Pass | Pass       |
| Generic    | Navigate to the water fountain                             | Pass | Fail | Fail | Fail       |
| Generic    | Drive to the broom                                         | Pass | Pass | Pass | Pass       |
| Generic    | Walk to monitor                                            | Pass | Pass | Fail | Fail       |
| Specific   | Walk to the tiny monitor                                   | Fail | Fail | Fail | Fail       |
| Specific   | Walk to the smallest monitor                               | Pass | Pass | Pass | Pass       |
| Relational | Walk to the right most cone                                | Pass | Pass | Pass | Pass       |
| Relational | Walk to the table with the can on it                       | Pass | Fail | Fail | Fail       |
| Relational | Walk to the table next to the red backpack                 | Pass | Pass | Pass | Pass       |
| Relational | Go the blue chair with the backpack on it                  | Pass | Pass | Pass | Pass       |
| Relational | Walk to the leftmost table                                 | Pass | Fail | Fail | Fail       |
| Relational | Go to backpack closest to the shoe                         | Pass | Pass | Pass | Pass       |
| Relational | Walk to shoe next to the red backpack                      | Pass | Pass | Pass | Pass       |
| Relational | Remove the trash from the floor                            | Fail | Fail | Fail | Fail       |
| Relational | Walk to the table with the monitor                         | Fail | Fail | Fail | Fail       |
| Relational | Drive to the closest monitor to the table                  | Pass | Pass | Pass | Pass       |
| Relational | Go to the table with the bottle on it                      | Fail | Fail | Fail | Fail       |
| Relational | Go to the bottle on top of the table                       | Pass | Pass | Pass | Pass       |
| Relational | Go to the TV closest to the person                         | Pass | Pass | Pass | Pass       |
| Relational | Go to the person wearing a blue shirt                      | Pass | Fail | Fail | Fail       |
| Relational | Run to to the chair with the blue coat                     | Pass | Fail | Fail | Fail       |
| Relational | Move to the backpack on the chair                          | Fail | Fail | Fail | Fail       |
| Relational | Move to the black backpack on the chair                    | Fail | Fail | Fail | Fail       |
| Relational | Drive to the chair with the backpack on it that is not red | Fail | Fail | Fail | Fail       |
| Contextual | Find something that can help firefighters                  | Pass | Pass | Pass | Pass       |
| Contextual | Go to something that can clean the dirty floor             | Fail | Fail | Fail | Fail       |
| Contextual | I am thirsty. Walk to somewhere this can be fixed          | Fail | Fail | Fail | Fail       |
| Contextual | Go to a place where I can watch a movie                    | Pass | Pass | Pass | Pass       |
| Contextual | Drive to a place where I can watch a video                 | Fail | Fail | Fail | Fail       |

436 All the prompts used in classroom environment for testing the two different input representations A  
437 & B are presented in Table 8.

Table 6: Scene-03: Outdoor

| Category   | Scene                                                                          | Code | OD   | WP   | Path& Exec |
|------------|--------------------------------------------------------------------------------|------|------|------|------------|
| Generic    | Wander to fire hydrant                                                         | Pass | Pass | Pass | Pass       |
| Generic    | Step towards the grill                                                         | Pass | Fail | Fail | Fail       |
| Generic    | Walk to the skateboard                                                         | Pass | Pass | Pass | Pass       |
| Generic    | Walk to the bike                                                               | Pass | Pass | Fail | Fail       |
| Generic    | Walk to the bike                                                               | Pass | Pass | Pass | Pass       |
| Generic    | Go to bike rack                                                                | Pass | Pass | Pass | Pass       |
| Generic    | Go to the sign                                                                 | Pass | Pass | Fail | Fail       |
| Generic    | Go to the bench                                                                | Pass | Pass | Pass | Pass       |
| Specific   | Sashay to the stop sign                                                        | Pass | Pass | Pass | Pass       |
| Specific   | Go to the basketball hoop                                                      | Pass | Pass | Pass | Pass       |
| Specific   | Roam towards the blue car                                                      | Pass | Pass | Pass | Pass       |
| Specific   | Trot towards the red bag                                                       | Pass | Pass | Pass | Pass       |
| Specific   | Go to the red object generically                                               | Fail | Fail | Fail | Fail       |
| Relational | Proceed to the middle cone                                                     | Pass | Pass | Pass | Pass       |
| Relational | Journey to the tree next to the backpack                                       | Fail | Fail | Fail | Fail       |
| Relational | Trek to the backpack by the tree                                               | Pass | Pass | Pass | Pass       |
| Contextual | A firefighter needs water. Walk to a source of water                           | Pass | Fail | Fail | Fail       |
| Contextual | Head towards something that can help firefighters                              | Pass | Pass | Pass | Pass       |
| Contextual | You are a dog that needs to mark its territory. Go to a place that can do this | Pass | Pass | Pass | Pass       |
| Contextual | You are carrying trash, Find somewhere to dump                                 | Pass | Pass | Pass | Pass       |
| Contextual | Find me something to do a kick flip on                                         | Pass | Pass | Pass | Pass       |
| Contextual | I want to shoot some hoops. Take me there                                      | Fail | Fail | Fail | Fail       |
| Contextual | Move to a faster mode of transportation                                        | Pass | Pass | Pass | Pass       |
| Contextual | Head to the fastest mode of transportation                                     | Pass | Pass | Pass | Pass       |

Table 7: Scene-04: Courtyard

| Category   | Scene                                                                                  | Code | OD   | WP   | Path& Exec |
|------------|----------------------------------------------------------------------------------------|------|------|------|------------|
| Generic    | Run to the door                                                                        | Pass | Pass | Pass | Pass       |
| Generic    | Run towards the backpack                                                               | Pass | Pass | Pass | Pass       |
| Generic    | Drive to the wagon                                                                     | Pass | Pass | Pass | Pass       |
| Generic    | Navigate to the stairs                                                                 | Pass | Pass | Pass | Pass       |
| Specific   | Proceed towards the garbage can on the right                                           | Pass | Pass | Pass | Pass       |
| Specific   | Stroll to the recycle bin on the left                                                  | Pass | Pass | Fail | Fail       |
| Specific   | Sprint to the picnic table                                                             | Pass | Pass | Pass | Pass       |
| Relational | Go to the bench with water container                                                   | Pass | Pass | Pass | Pass       |
| Relational | Walk to the bench with nothing on it                                                   | Pass | Pass | Pass | Pass       |
| Relational | Proceed to the bench with most objects on it                                           | Fail | Fail | Fail | Fail       |
| Relational | Move towards the backpack farthest from the bench                                      | Pass | Fail | Fail | Fail       |
| Relational | Head towards the middle cone                                                           | Fail | Fail | Fail | Fail       |
| Relational | Head towards to middle cone in the row of cones                                        | Pass | Pass | Pass | Pass       |
| Relational | Go to the table with only 1 chair                                                      | Fail | Fail | Fail | Fail       |
| Relational | Go to the table with only 1 chair. There are multiple groups of chairs multiple tables | Pass | Pass | Pass | Pass       |
| Relational | Step towards the column closest to the cart                                            | Pass | Pass | Pass | Pass       |
| Relational | Move to the largest group of benches                                                   | Pass | Pass | Pass | Pass       |
| Relational | Walk towards the table with the umbrella                                               | Fail | Fail | Fail | Fail       |
| Relational | Walk towards the table with the umbrella                                               | Pass | Pass | Pass | Pass       |
| Relational | Drive to the table without any chairs                                                  | Pass | Pass | Pass | Pass       |
| Relational | Walk to black table with 6 chairs                                                      | Fail | Fail | Fail | Fail       |
| Relational | Walk to the table with most chairs                                                     | Pass | Pass | Pass | Pass       |
| Relational | Navigate to the table with the backpack                                                | Fail | Fail | Fail | Fail       |
| Contextual | Go to nearest entrance to the building                                                 | Fail | Fail | Fail | Fail       |
| Contextual | Go to something that you would hold open for someone elderly                           | Pass | Fail | Fail | Fail       |
| Contextual | Go to something that will make it easy to carry heavy luggage                          | Pass | Fail | Fail | Fail       |
| Contextual | Go to somewhere I can eat my lunch                                                     | Pass | Fail | Fail | Fail       |
| Contextual | Go up to the second floor                                                              | Fail | Fail | Fail | Fail       |
| Contextual | Go find something to climb                                                             | Fail | Fail | Fail | Fail       |
| Contextual | Run upstairs                                                                           | Pass | Pass | Pass | Pass       |
| Contextual | Find me somewhere to park my bike                                                      | Pass | Pass | Pass | Pass       |

Table 8: Scene-05: Classroom

| Category   | Sentence                                                                  | A    | B    |
|------------|---------------------------------------------------------------------------|------|------|
| Generic    | Go to the backpack                                                        | Pass | Pass |
| Generic    | Move towards the backpack                                                 | Pass | Pass |
| Generic    | Drive to the backpack                                                     | Pass | Pass |
| Generic    | Run towards the backpack                                                  | Pass | Pass |
| Generic    | Go to the cone                                                            | Pass | Pass |
| Generic    | Go to conical traffic delineator                                          | Pass | Pass |
| Generic    | Go to the trash can                                                       | Pass | Pass |
| Generic    | Walk to the whiteboard                                                    | Pass | Pass |
| Generic    | Proceed to the broom                                                      | Pass | Pass |
| Generic    | Trek towards the wagon                                                    | Pass | Pass |
| Generic    | Find paper towels                                                         | Pass | Pass |
| Generic    | Go to the outlet                                                          | Pass | Pass |
| Specific   | Go to the red backpack                                                    | Pass | Pass |
| Specific   | Go to the black backpack                                                  | Pass | Pass |
| Specific   | Navigate to the backpack on the left                                      | Pass | Pass |
| Specific   | Drive to the backpack on the right                                        | Pass | Pass |
| Specific   | Go to the whiteboard in front of you                                      | Pass | Pass |
| Specific   | Move to the whiteboard on your right                                      | Pass | Pass |
| Specific   | Move to the whiteboard on the right                                       | Pass | Fail |
| Specific   | Go to the backpack on your right                                          | Pass | Pass |
| Specific   | Walk to the backpack on the left                                          | Pass | Fail |
| Specific   | Go to the leftmost backpack on the right                                  | Pass | Fail |
| Specific   | Go to the orange cone on your right                                       | Fail | Pass |
| Specific   | Go to the middle outlet                                                   | Pass | Fail |
| Relational | Go to backpack to the right of the red backpack                           | Pass | Pass |
| Relational | Drive to the backpack that is to the left of the black backpack           | Pass | Fail |
| Relational | Walk to the bag that is next to the black bag                             | Fail | Fail |
| Relational | Move towards the backpack under the whiteboard                            | Pass | Pass |
| Relational | Walk to the backpack on the chair                                         | Pass | Pass |
| Relational | Go to the chair with the backpack                                         | Pass | Fail |
| Relational | Walk to the backpack on top of the chair                                  | Pass | Fail |
| Relational | Run to the rightmost backpack                                             | Pass | Pass |
| Relational | Walk to the leftmost backpack                                             | Pass | Pass |
| Relational | Go to the middle chair                                                    | Pass | Fail |
| Relational | Go to the leftmost backpack on your right                                 | Fail | Pass |
| Relational | Go to the middle chair in the row of chairs                               | Pass | Pass |
| Relational | Go to the backpack to the left of the cone                                | Pass | Fail |
| Relational | Go the cone to the left of the backpack                                   | Pass | Pass |
| Relational | Go to the second chair from the left                                      | Pass | Fail |
| Contextual | Go to somewhere I can sit down                                            | Pass | Pass |
| Contextual | Find a place for me to rest                                               | Pass | Fail |
| Contextual | Go to somewhere I can speak from                                          | Pass | Fail |
| Contextual | Find a place to store cleaning supplies                                   | Pass | Fail |
| Contextual | Find me something to write on                                             | Pass | Pass |
| Contextual | My friend has question. Go to somewhere you can explain the answer to him | Fail | Fail |
| Contextual | I spilled a lot of sand. Find me something to pick up my mess             | Pass | Pass |
| Contextual | Walk to something I can put my laptop in                                  | Fail | Fail |
| Contextual | I spilled water. Find me something to clean this up                       | Pass | Fail |
| Contextual | Go to somewhere I can google something                                    | Pass | Pass |
| Contextual | Go to somewhere I can charge my phone                                     | Pass | Pass |

## 438 6.2 Code Prompt

439 Navigation Prompt for the concatenated single image input. We leverage the original prompts pre-  
440 sented in [14].

```

441 import math
442
443
444 class ImagePatch:
445     """A Python class containing a crop of an image centered around a
446         particular object, as well as relevant information.
447     Attributes
448     -----
449     cropped_image : array_like
450         An array-like of the cropped image taken from the original image.
451     left, lower, right, upper : int
452         An int describing the position of the (left/lower/right/upper)
453         border of the crop's bounding box in the original image.
454     frame: name of camera frame
455
456     Methods
457     -----
458     find(object_name: str)->List[ImagePatch]
459         Returns a list of new ImagePatch objects containing crops of the
460         image centered around any objects found in the
461         image matching the object_name.
462     exists(object_name: str)->bool
463         Returns True if the object specified by object_name is found in the
464         image, and False otherwise.
465     verify_property(property: str)->bool
466         Returns True if the property is met, and False otherwise.
467     best_text_match(option_list: List[str], prefix: str)->str
468         Returns the string that best matches the image.
469     simple_query(question: str=None)->str
470         Returns the answer to a basic question asked about the image. If no
471         question is provided, returns the answer to "What is this?".
472     llm_query(question: str, long_answer: bool)->str
473         References a large language model (e.g., GPT) to produce a response
474         to the given question. Default is short-form answers, can be
475         made long-form responses with the long_answer flag.
476     compute_depth()->float
477         Returns the median depth of the image crop.
478     crop(left: int, lower: int, right: int, upper: int)->ImagePatch
479         Returns a new ImagePatch object containing a crop of the image at
480         the given coordinates.
481     """
482
483     def __init__(self, image, left: int = None, lower: int = None, right:
484         int = None, upper: int = None, frame = None):
485         """Initializes an ImagePatch object by cropping the image at the
486             given coordinates and stores the coordinates as
487             attributes. If no coordinates are provided, the image is left
488             unmodified, and the coordinates are set to the
489             dimensions of the image.
490         Parameters
491         -----
492         image : array_like
493             An array-like of the original image.
494         left, lower, right, upper : int

```

```

495         An int describing the position of the (left/lower/right/upper)
496         border of the crop's bounding box in the original image.
497     """
498     if left is None and right is None and upper is None and lower is
499     None:
500         self.cropped_image = image
501         self.left = 0
502         self.lower = 0
503         self.right = image.shape[2] # width
504         self.upper = image.shape[1] # height
505     else:
506         self.cropped_image = image[:, lower:upper, left:right]
507         self.left = left
508         self.upper = upper
509         self.right = right
510         self.lower = lower
511
512     self.width = self.cropped_image.shape[2]
513     self.height = self.cropped_image.shape[1]
514
515     self.horizontal_center = (self.left + self.right) / 2
516     self.vertical_center = (self.lower + self.upper) / 2
517
518     self.frame = frame
519
520     def find(self, object_name: str) -> List[ImagePatch]:
521         """Returns a list of ImagePatch objects matching object_name
522         contained in the crop if any are found.
523         Otherwise, returns an empty list.
524         Parameters
525         -----
526         object_name : str
527             the name of the object to be found
528
529         Returns
530         -----
531         List[ImagePatch]
532             a list of ImagePatch objects matching object_name contained in
533             the crop
534
535         Examples
536         -----
537         >>> # return the foo
538         >>> def execute_command(image) -> List[ImagePatch]:
539         >>> image_patch = ImagePatch(image)
540         >>> foo_patches = image_patch.find("foo")
541         >>> return foo_patches
542         """
543         return find_in_image(self.cropped_image, object_name)
544
545     def exists(self, object_name: str) -> bool:
546         """Returns True if the object specified by object_name is found in
547         the image, and False otherwise.
548         Parameters
549         -----
550         object_name : str
551             A string describing the name of the object to be found in the
552             image.
553

```

```

554 Examples
555 -----
556 >>> # Are there both foos and garply bars in the photo?
557 >>> def execute_command(image)->str:
558 >>> image_patch = ImagePatch(image)
559 >>> is_foo = image_patch.exists("foo")
560 >>> is_garply_bar = image_patch.exists("garply bar")
561 >>> return bool_to_yesno(is_foo and is_garply_bar)
562 """
563 return len(self.find(object_name)) > 0
564
565 def verify_property(self, object_name: str, visual_property: str) ->
566 bool:
567     """Returns True if the object possesses the visual property, and
568     False otherwise.
569     Differs from 'exists' in that it presupposes the existence of the
570     object specified by object_name, instead checking whether the
571     object possesses the property.
572     Parameters
573     -----
574     object_name : str
575         A string describing the name of the object to be found in the
576         image.
577     visual_property : str
578         A string describing the simple visual property (e.g., color,
579         shape, material) to be checked.
580
581     Examples
582     -----
583     >>> # Do the letters have blue color?
584     >>> def execute_command(image) -> str:
585     >>> image_patch = ImagePatch(image)
586     >>> letters_patches = image_patch.find("letters")
587     >>> # Question assumes only one letter patch
588     >>> return bool_to_yesno(letters_patches[0].verify_property("letters
589     ", "blue"))
590     """
591     return verify_property(self.cropped_image, object_name, property)
592
593 def best_text_match(self, option_list: List[str]) -> str:
594     """Returns the string that best matches the image.
595     Parameters
596     -----
597     option_list : str
598         A list with the names of the different options
599     prefix : str
600         A string with the prefixes to append to the options
601
602     Examples
603     -----
604     >>> # Is the foo gold or white?
605     >>> def execute_command(image)->str:
606     >>> image_patch = ImagePatch(image)
607     >>> foo_patches = image_patch.find("foo")
608     >>> # Question assumes one foo patch
609     >>> return foo_patches[0].best_text_match(["gold", "white"])
610     """
611     return best_text_match(self.cropped_image, option_list)
612

```



```

613 def simple_query(self, question: str = None) -> str:
614     """Returns the answer to a basic question asked about the image. If
615         no question is provided, returns the answer
616         to "What is this?". The questions are about basic perception, and
617         are not meant to be used for complex reasoning
618         or external knowledge.
619     Parameters
620     -----
621     question : str
622         A string describing the question to be asked.
623
624     Examples
625     -----
626
627     >>> # Which kind of baz is not fredding?
628     >>> def execute_command(image) -> str:
629     >>> image_patch = ImagePatch(image)
630     >>> baz_patches = image_patch.find("baz")
631     >>> for baz_patch in baz_patches:
632     >>> if not baz_patch.verify_property("baz", "fredding"):
633     >>> return baz_patch.simple_query("What is this baz?")
634
635     >>> # What color is the foo?
636     >>> def execute_command(image) -> str:
637     >>> image_patch = ImagePatch(image)
638     >>> foo_patches = image_patch.find("foo")
639     >>> foo_patch = foo_patches[0]
640     >>> return foo_patch.simple_query("What is the color?")
641
642     >>> # Is the second bar from the left quuxy?
643     >>> def execute_command(image) -> str:
644     >>> image_patch = ImagePatch(image)
645     >>> bar_patches = image_patch.find("bar")
646     >>> bar_patches.sort(key=lambda x: x.horizontal_center)
647     >>> bar_patch = bar_patches[1]
648     >>> return bar_patch.simple_query("Is the bar quuxy?")
649     """
650     return simple_query(self.cropped_image, question)
651
652 def compute_depth(self):
653     """Returns the median depth of the image crop
654     Parameters
655     -----
656     Returns
657     -----
658     float
659         the median depth of the image crop
660
661     Examples
662     -----
663     >>> # the bar furthest away
664     >>> def execute_command(image)->ImagePatch:
665     >>> image_patch = ImagePatch(image)
666     >>> bar_patches = image_patch.find("bar")
667     >>> bar_patches.sort(key=lambda bar: bar.compute_depth())
668     >>> return bar_patches[-1]
669     """
670     depth_map = compute_depth(self.cropped_image)
671     return depth_map.median()

```

```

672
673 def crop(self, left: int, lower: int, right: int, upper: int) ->
674     ImagePatch:
675     """Returns a new ImagePatch cropped from the current ImagePatch.
676     Parameters
677     -----
678     left, lower, right, upper : int
679         The (left/lower/right/upper)most pixel of the cropped image.
680     -----
681     """
682     return ImagePatch(self.cropped_image, left, lower, right, upper,
683         self.frame)
684
685 def overlaps_with(self, left, lower, right, upper):
686     """Returns True if a crop with the given coordinates overlaps with
687     this one,
688     else False.
689     Parameters
690     -----
691     left, lower, right, upper : int
692         the (left/lower/right/upper) border of the crop to be checked
693
694     Returns
695     -----
696     bool
697         True if a crop with the given coordinates overlaps with this one
698         , else False
699
700     Examples
701     -----
702     >>> # black foo on top of the qux
703     >>> def execute_command(image) -> ImagePatch:
704     >>> image_patch = ImagePatch(image)
705     >>> qux_patches = image_patch.find("qux")
706     >>> qux_patch = qux_patches[0]
707     >>> foo_patches = image_patch.find("black foo")
708     >>> for foo in foo_patches:
709     >>> if foo.vertical_center > qux_patch.vertical_center
710     >>> return foo
711     """
712     return self.left <= right and self.right >= left and self.lower <=
713         upper and self.upper >= lower
714
715 def best_image_match(list_patches: List[ImagePatch], content: List[str],
716     return_index=False) -> Union[ImagePatch, int]:
717     """Returns the patch most likely to contain the content.
718     Parameters
719     -----
720     list_patches : List[ImagePatch]
721     content : List[str]
722         the object of interest
723     return_index : bool
724         if True, returns the index of the patch most likely to contain the
725         object
726
727     Returns
728     -----
729     int
730         Patch most likely to contain the object

```

```

731     """
732     return best_image_match(list_patches, content, return_index)
733
734
735 def distance(patch_a: ImagePatch, patch_b: ImagePatch) -> float:
736     """
737     Returns the distance between the edges of two ImagePatches. If the
738     patches overlap, it returns a negative distance
739     corresponding to the negative intersection over union.
740
741     Parameters
742     -----
743     patch_a : ImagePatch
744     patch_b : ImagePatch
745
746     Examples
747     -----
748     # Return the qux that is closest to the foo
749     >>> def execute_command(image):
750     >>> image_patch = ImagePatch(image)
751     >>> qux_patches = image_patch.find('qux')
752     >>> foo_patches = image_patch.find('foo')
753     >>> foo_patch = foo_patches[0]
754     >>> qux_patches.sort(key=lambda x: distance(x, foo_patch))
755     >>> return qux_patches[0]
756     """
757     return distance(patch_a, patch_b)
758
759
760 def bool_to_yesno(bool_answer: bool) -> str:
761     return "yes" if bool_answer else "no"
762
763
764 def coerce_to_numeric(string):
765     """
766     This function takes a string as input and returns a float after removing
767     any non-numeric characters.
768     If the input string contains a range (e.g. "10-15"), it returns the
769     first value in the range.
770     """
771     return coerce_to_numeric(string)
772
773 ### Nav Client
774 """
775 Navigates an agent to an object in an image given its center coordinates
776 Parameters
777 -----
778 x : x coordinate of the center of the object
779 y : y coordinate of the center of the object
780 """
781 Examples
782 -----
783 >>> # Go to the blue foo.
784 >>> def execute_command(image)
785 >>> image_patch = ImagePatch(image)
786 >>> foo_patches = image_patch.find("foo")
787 >>> # Verify visual property
788 >>> blue_color_patches = []
789 >>> for foo_patch in foo_patches:

```

```

790     >>> if verify_property(blue, "color")
791     >>> blue_color_patches.append(foo_patch)
792     >>> inputs = (blue_color_patches[0].horizontal_center,
793                 blue_color_patches[0].vertical_center)
794     >>> return {'function': 'nav_function', 'inputs': inputs, 'box': [
795                 blue_color_patches[0].left, blue_color_patches[0].lower,
796                 blue_color_patches[0].right, blue_color_patches[0].upper]}
797     """
798 def navigate_to_object(double x, double y):
799
800     """
801
802
803
804 Write a function using Python and/or the ImagePatch class (above) that
805     could be executed to provide an answer to the query by calling one of
806     the functions in the Nav Client (navigate_to_object).
807 Note using the ImagePatch is not required for all queries. If the query is
808     not relevant to navigation, return None for the function and a string
809     describing the problem.
810
811 Consider the following guidelines:
812 - Use base Python (comparison, sorting) for basic logical operations, left/
813     right/up/down, math, etc.
814 - Use the llm_query function to access external information and answer
815     informational questions not concerning the image.
816 - All properties such as color should be verified using the verify_property
817     function. "go to the blue foo" implies "go to foo if foo is blue"
818 - The output of this function should be a dict {function: 'function in the
819     nav client', inputs: 'inputs to the chosen nav client function', box: [
820     left, lower, right, upper]}, or for an error {function: 'None', error:
821     'message describing the problem'}
822 - If more than one object is found pick the best match
823
824 Query: INSERT_QUERY_HERE

```
